# Supplementary material
Source: MDPI journal article supplement (https://www.mdpi.com/2311-5637/9/11/984)
Supplement: s1 [file s1]

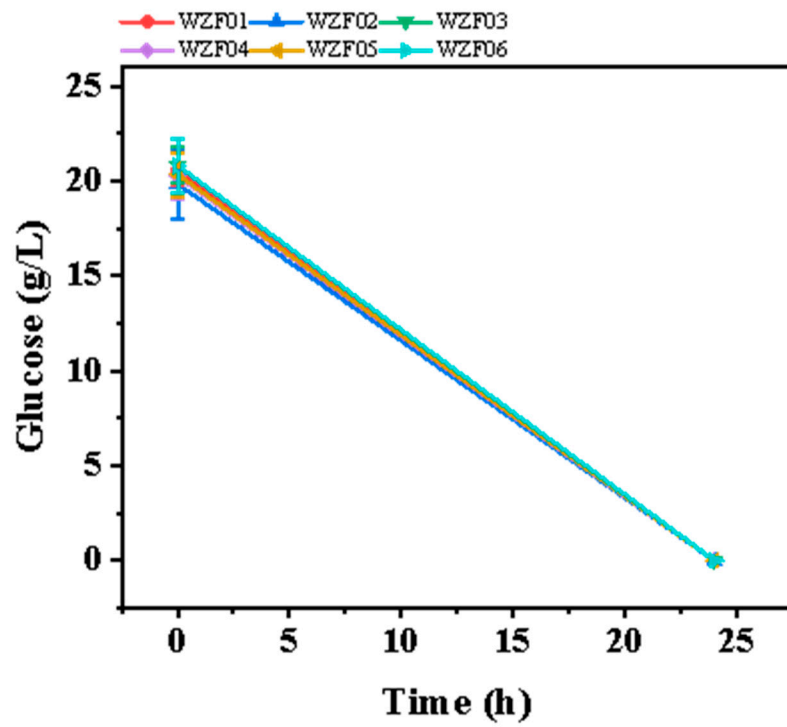

**Fig. S1** Glucose consumption in the context of FDH expression's impact on strain metabolism with the addition of formate. The culture medium was MM medium, supplemented with 20 g/L glucose, 5 g/L formate, and 10 g/L acetate. The fermentation process spanned 96 hours. All data were presented as the mean  $\pm$  s.d., with error bars denoting standard error (n=3).

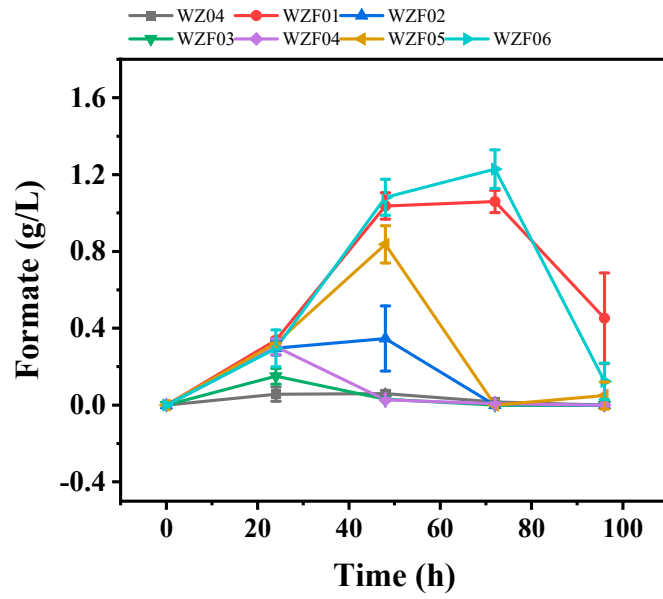

**Fig. S2** Formate production in the context of FDH expression's impact on strain metabolism without exogenous formate addition. The culture medium was MM medium, supplemented with 20 g/L glucose, 5 g/L formate, and 10 g/L acetate. The fermentation process spanned 96 hours. All data were presented as the mean  $\pm$  s.d., with error bars denoting standard error (n=3).

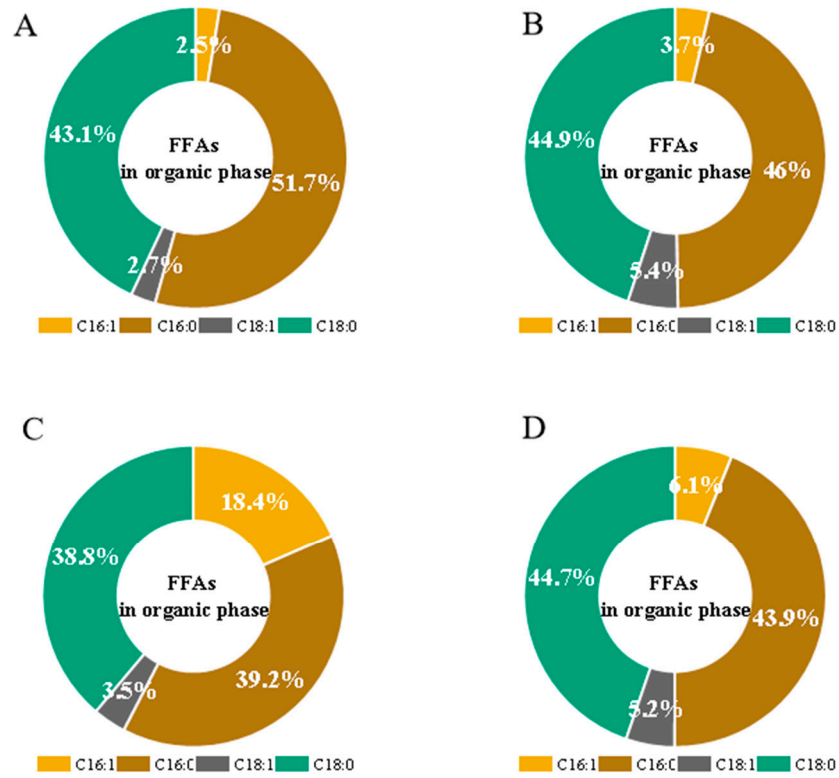

**Fig. S3** . The proportion of FFAs in the organic phase. ABCD conditions were consistent with Figure 5 in the main text. All data were presented as the mean  $\pm$  s.d., with error bars denoting standard error (n=3).

**Table S1.** Plasmids used in this study<sup>a</sup>

| Plasmids                      | Genotype or characteristic                                                                    | Resource                |
|-------------------------------|-----------------------------------------------------------------------------------------------|-------------------------|
| <b>pSP-GM2</b>                | 2 $\mu$ m, AmpR, <i>URA3</i> , TEF1p, CYC1t, PGK1p, ADH1t                                     | Laboratory preservation |
| <b>pIY-C04</b>                | 2-micron, AmpR, HIS3, TEF1p, ADHt, PGK1p, CYCt                                                | Laboratory preservation |
| <b>pFDH3</b>                  | pSP-GM2-(TEF1p- <b>FDH3</b> -CYC1t)                                                           | Laboratory preservation |
| <b>pFDH4</b>                  | pSP-GM2-(TEF1p- <b>FDH4</b> -CYC1t)                                                           | Laboratory preservation |
| <b>pFDH5</b>                  | pSP-GM2-(TEF1p- <b>FDH5</b> -CYC1t)                                                           | Laboratory preservation |
| <b>pFDH34</b>                 | pSP-GM2-(TEF1p- <b>FDH3</b> -CYC1t)- (PGK1p- <b>FDH4</b> -ADH1t)                              | Laboratory preservation |
| <b>pFDH45</b>                 | pSP-GM2-(TEF1p- <b>FDH4</b> -CYC1t)- (PGK1p- <b>FDH5</b> -ADH1t)                              | Laboratory preservation |
| <b>pFDH345</b>                | pSP-GM2-(TEF1p- <b>FDH5</b> -CYC1t)- (PGK1p- <b>FDH4</b> -ADH1t)- (PGI1p- <b>FDH3</b> -PYK1t) | Laboratory preservation |
| <b>pScACS1</b>                | pIY-C04-(TEF1p- <b>ScACS1</b> -ADH1t )                                                        | This study              |
| <b>pScACS2</b>                | pIY-C04-(TEF1p- <b>ScACS2</b> -ADH1t )                                                        | This study              |
| <b>pYIACS1</b>                | pIY-C04-(TEF1p- <b>YIACS1</b> -ADH1t )                                                        | This study              |
| <b>PYIACS2</b>                | pIY-C04-(TEF1p- <b>YIACS2</b> -ADH1t )                                                        | This study              |
| <b>pSeACSL<sup>641D</sup></b> | pIY-C04-(TEF1p- <b>SeACSL<sup>641D</sup></b> -ADH1t )                                         | This study              |

<sup>a</sup> The bold text in the table indicates the name of the overexpressed gene.

**Table S2.** *S. cerevisiae* strains used in this study

| Strain | Genotype or characteristic                                      | Resource   |
|--------|-----------------------------------------------------------------|------------|
| YJZ08  | <i>MATa MAL2-8c SUC2 his3Δ1 ura3-52 hfd1Δ pox1Δ faa1Δ faa4Δ</i> | [1]        |
| WZ01   | YJZ08 with pScACS1                                              | This study |
| WZ02   | YJZ08 with pScACS2                                              | This study |
| WZ03   | YJZ08 with pYIACS1                                              | This study |
| WZ04   | YJZ08 with pYIACS2                                              | This study |
| WZ05   | YJZ08 with pScACS <sup>L641D</sup>                              | This study |
| WZF01  | WZ04 with pFDH3                                                 | This study |
| WZF02  | WZ04 with pFDH34                                                | This study |
| WZF03  | WZ04 with pFDH345                                               | This study |
| WZF04  | WZ04 with pFDH4                                                 | This study |
| WZF05  | WZ04 with pFDH5                                                 | This study |
| WZF06  | WZ04 with pFDH45                                                | This study |

**Table S3.** Primers used in this study

| Primer No. | Name                      | Sequence (5'-3')                            |
|------------|---------------------------|---------------------------------------------|
| P1         | SCACS1-F                  | AAGCGGCCGCATGACAATCAAGGAACATAAAGTAGT        |
| P2         | SCACS1-R                  | GTCAACAACGTTTATTTCTTTTTTGAGAGAAAAATTGGTTC   |
| P3         | SCACS2-F                  | AAGCGGCCGCATGTCGCCCTCTGCCGTA                |
| P4         | SCACS2-R                  | TGTCAACAACGTTTACAACCTTGACCGAATCAATTAGATGTCT |
| P5         | YLACS1-F                  | ACAAGCGGCCGCATGGAGTATTATTGTGGGGTAAACCAGGT   |
| P6         | YLACS1-R                  | AGAATTGTTAATTAATTAGAGCTTGGAAGAGCTGCC        |
| P7         | YLACS2-F                  | TACAAGCGGCCGCATGACAGTCAACTCCACTTTTAGATCG    |
| P8         | YLACS2-R                  | AATTGTTAATTAACTACTGTTCAACCAGATCAGGATACAG    |
| P9         | SEACS <sup>L641D</sup> -F | CAAGCGGCCGCATGTCTCAGACGCATAAGCACG           |
| P10        | SEACS <sup>L641D</sup> -R | GTCAACAACGTTTAAGATGGCATAGCAATAGCCTG         |

**Table S4. The exogenous genes used in this study.**

| Synthesized genes | Sequence (5'-3')                                                                                                                                                                                                                                                                                                                                                                                                                                                                                                                                                                                                                                                                                                                                                                                                                                                                                                                                                                                                                                                                                                                                                                                                                                                                                                                                                                                                                                                                                                                                                                                                                                                                                                                                                                                                                                                                                                                                                                                                                                                                                                                                                                                                                                      |
|-------------------|-------------------------------------------------------------------------------------------------------------------------------------------------------------------------------------------------------------------------------------------------------------------------------------------------------------------------------------------------------------------------------------------------------------------------------------------------------------------------------------------------------------------------------------------------------------------------------------------------------------------------------------------------------------------------------------------------------------------------------------------------------------------------------------------------------------------------------------------------------------------------------------------------------------------------------------------------------------------------------------------------------------------------------------------------------------------------------------------------------------------------------------------------------------------------------------------------------------------------------------------------------------------------------------------------------------------------------------------------------------------------------------------------------------------------------------------------------------------------------------------------------------------------------------------------------------------------------------------------------------------------------------------------------------------------------------------------------------------------------------------------------------------------------------------------------------------------------------------------------------------------------------------------------------------------------------------------------------------------------------------------------------------------------------------------------------------------------------------------------------------------------------------------------------------------------------------------------------------------------------------------------|
| <b>ScACS1</b>     | ATGACAATCAAGGAACATAAAGTAGTTTATGAAGCTCACAAACGTAAAGGCTCTTAAGGC<br>TCCTCAACATTTTACAACAGCCAACCCGGCAAGGGTTACGTTACTGATATGCAACATTA<br>TCAAGAAATGTATCAACAATCTATCAATGAGCCAGAAAAATTCTTTGATAAGATGGCTAA<br>GGAATACTTGCATTGGGATGCTCCATACACCAAAGTTCAATCTGGTTCATTGAACAATGG<br>TGATGTTGCATGGTTTTTGAACGGTAAATTGAATGCATCATACAATTGTGTTGACAGACA<br>TGCCTTTGCTAATCCCGACAAGCCAGCTTTGATCTATGAAGCTGATGACGAATCCGACAA<br>CAAAATCATCACATTGGTGAATTACTCAGAAAAGTTTCCCAAATCGTGCGTGTCTTAA<br>AAGCTGGGGCGTTAAGAAAGGTGACACAGTGGCTATCTATTTGCCAATGATTCCAGAAG<br>CGGTCATTGCTATGTTGGCTGTGGCTCGTATTGGTGCTATTCACTCTGTTGTCTTTGCTGG<br>GTTCTCCGCTGGTTCGTTGAAAGATCGTGCTGTTGACGCTAATTCTAAAGTGGTCACTACT<br>TGTGATGAAGGTAAAGAGGTGGTAAGACCATCAACACTAAAAAAATTGTTGACGAAGG<br>TTTGAACGGAGTCGATTGGTTTCCCGTATCTTGGTTTTCCAAAGAACTGGTACTGAAGGT<br>ATTCCAATGAAGGCCGGTAGAGATTACTGGTGGCATGAGGAGGCCGTAAGCAGAGAAC<br>TTACCTACCTCCTGTTTCATGTGACGCTGAAGATCCTCTATTTTTATTATACACTTCCGGTT<br>CCACTGGTTCTCAAAGGGTGTCTGTTCACTACAGGTGGTTATTTATTAGGTGCCGCTT<br>AACAACTAGATACGTTTTTGTATTTACCCAGAAGATGTTCTTCACTGCCGGTGACGT<br>CGGCTGGATCACGGTCAACCTATGCTCTATATGGTCCATTAACCTTGGGTACCGCCTC<br>AATAATTTTGAATCCACTCCTGCCTACCCAGATTATGGTAGATATTGGAGAATTATCCA<br>ACGTCACAAGGCTACCCATTTCTATGTGGCTCCAACTGCTTTAAGATTAATCAAACGTGT<br>AGGTGAAGCCGAAATTGCCAAATATGACACTTCCTCATTACGTGCTTGGGTTCCGTCGG<br>TGAACCAATCTCTCCAGACTTATGGGAATGGTATCATGAAAAAGTGGGTAACAAAAACT<br>GTGTCATTTGTGACACTATGTGGCAAACAGAGTCTGGTTCTCATTTAATTGCTCCTTTGGC<br>AGGTGCTGTCCCAACAAAACCTGGTTCTGCTACCGTGCCATTCTTTGGTATTAACGCTTGT<br>ATCATTGACCCTGTTACAGGTGTGGAATTAGAAGGTAATGATGTGCAAGGTGTCCTTGCC<br>GTTAAATCACCATGGCCATCAATGGCTAGATCTGTTTGAACCAACACGACCGTTACATG<br>GATACTTACTTGAAACCTTATCCTGGTCACTATTTACAGGTGATGGTGCTGGTAGAGAT<br>CATGATGGTTACTACTGGATCAGGGGTAGAGTTGACGACGTTGTAAATGTTCCGGTCAT<br>AGATTATCCACATCAGAAATTGAAGCATCTATCTCAAATCACGAAAACGTCTCGGAAGCT<br>GCTGTTGTCGGTATTCCAGATGAATTGACCGGTCAAACCGTCGTTGCATATGTTCCCTAA<br>AAGATGGTTATCTACAAAACAACGCTACTGAAGGTGATGCAGAACACATCACACCAGAT<br>AATTTACGTAGAGAATTGATCTTACAAGTTAGGGGTGAGATTGGTCCTTTGCGCTACCA<br>AAAACCATTATTCTAGTTAGAGATCTACCAAGAACAAGGTCAGGAAAGATTATGAGAAG<br>AGTTCTAAGAAAGGTTGCTTCTAACGAAGCCGAACGCTAGGTGACCTAACTACTTTGGC<br>CAACCCAGAAGTTGTACCTGCCATCATTCTGCTGTAGAGAACCAATTTTCTCTCAAAA<br>AAAGAAATAA |
| <b>ScACS2</b>     | ATGTCGCCCTCTGCCGTACAATCATCAAACTAGAGAAGACAGTCAAGTGAAATTGACAA<br>GTTGAAAGCAAAAATGTCCAGTCTGCCGCCACTGCGCAGCAGAGAAGGAACATGAGT<br>ATGAACATTTGACTTCGGTCAAGATCGTGCCACAACGGCCCATCTCAGATAGACTGCAGC<br>CCGCAATTGCTACCCACTATTCTCCACACTTGGACGGGTTGCAGGACTATCAGCGCTTGC<br>ACAAGGAGTCTATTGAAGACCTTGCTAAGTTCTTCGGTTCTAAAGCTACCCAATTTTAA<br>ACTGGTCTAAGCCATTCGATAAGGTGTTTCATCCCAGACCCTAAAACGGGCAGGCCCTCT                                                                                                                                                                                                                                                                                                                                                                                                                                                                                                                                                                                                                                                                                                                                                                                                                                                                                                                                                                                                                                                                                                                                                                                                                                                                                                                                                                                                                                                                                                                                                                                                                                                                                                                                                                                                                                                               |

|        |                                                                                                                                                                                                                                                                                                                                                                                                                                                                                                                                                                                                                                                                                                                                                                                                                                                                                                                                                                                                                                                                                                                                                                                                                                                                                                                                                                                                                                                                                                                                                                                                                                                                                                                                                                                                                                                                                                                                                                                                                            |
|--------|----------------------------------------------------------------------------------------------------------------------------------------------------------------------------------------------------------------------------------------------------------------------------------------------------------------------------------------------------------------------------------------------------------------------------------------------------------------------------------------------------------------------------------------------------------------------------------------------------------------------------------------------------------------------------------------------------------------------------------------------------------------------------------------------------------------------------------------------------------------------------------------------------------------------------------------------------------------------------------------------------------------------------------------------------------------------------------------------------------------------------------------------------------------------------------------------------------------------------------------------------------------------------------------------------------------------------------------------------------------------------------------------------------------------------------------------------------------------------------------------------------------------------------------------------------------------------------------------------------------------------------------------------------------------------------------------------------------------------------------------------------------------------------------------------------------------------------------------------------------------------------------------------------------------------------------------------------------------------------------------------------------------------|
|        | <p> TCCAGAACAAATGCATGGTTCCTCAACGGCCAATTAACGCCTGTTACAACGTGTTGACA<br/> GACATGCCTTGAAGACTCCTAACAAAGAAAGCCATTATTTTCGAAGGTGACGAGCCTGGCC<br/> AAGGCTATTCCATTACCTACAAGGAACTACTTGAAGAAGTTTGTCAAGTGGCACAAGTGC<br/> TGACTTACTCTATGGGCGTTCGCAAGGGCGATACTGTTGCCGTGTACATGCCTATGGTCC<br/> CAGAAGCAATCATAACCTTGTGGCCATTTCCTGATCGGTGCCATTCACTCCGTAGTCTT<br/> TGCCGGGTTTTCTTCCAACCTCTTGAGAGATCGTATCAACGATGGGGACTCTAAAGTTGT<br/> CATCACTACAGATGAATCCAACAGAGGTGGTAAAGTCATTGAGACTAAAAGAATTGTTG<br/> ATGACGCGCTAAGAGAGACCCAGGCGTGAGACACGTCTTGGTTTATAGAAAGACCAAC<br/> AATCCATCTGTTGCTTTCCATGCCCCCAGAGATTTGGATTGGGCAACAGAAAAGAAGAAA<br/> TACAAGACCTACTATCCATGCACACCCGTTGATTCTGAGGATCCATTATTCTGTTGTATA<br/> CGTCTGGTTCTACTGGTGCCCCAAGGGTGTCAACATTCTACCGCAGGTTACTTGCTGG<br/> GAGCTTTGTTGACCATGCGCTACACTTTTGACACTCACCAAGAAGACGTTTTCTTCACAG<br/> CTGGAGACATTGGCTGGATTACAGGCCACACTTATGTGGTTTATGGTCCCTTACTATATG<br/> GTTGTGCCACTTTGGTCTTTGAAGGGACTCCTGCGTACCCAAATTACTCCCGTTATTGGGA<br/> TATTATTGATGAACACAAAGTCACCCAATTTTATGTTGCGCCAACGTCTTGCGTTTGTG<br/> AAAAGAGCTGGTGATTCCCTACATCGAAAATCATTCCTTAAAATCTTTGCGTTGCTTGGGT<br/> TCGGTCGGTGAGCCAATTGTGCTGAAGTTTGGGAGTGGTACTCTGAAAAATAGGTAA<br/> AAATGAAATCCCCATTGTAGACACCTACTGGCAAACAGAATCTGGTTCGCATCTGGTCAC<br/> CCCCTGGCTGGTGGTGTACACCAATGAAACCGGGTCTGCCTCATTCCCCTCTTCGGT<br/> ATTGATGCAGTTGTTCTTGACCCTAACACTGGTGAAGAACTTAACACCAGCCACGACAG<br/> GGTGTCTTGGCGTCAAAGCTGCATGGCCATCATTGCAAGAACTATTGGAAAAATCAT<br/> GATAGGTATCTAGACACTTATTTGAACCTTACCCTGGCTACTATTTCACTGGTGATGGTG<br/> CTGCAAAGGATAAGGATGGTTATATCTGGATTTTGGGTCGTGTAGACGATGTGGTGAACG<br/> TCTCTGGTCACCGTCTGTCTACCGCTGAAATTGAGGCTGCTATTATCGAAGATCCAATTGT<br/> GGCCGAGTGTGCTGTTGTGCGATTCAACGATGACTTGACTGGTCAAGCAGTTGCTGCATT<br/> TGTGGTGTGAAAAACAAATCTAGTTGGTCCACCGCAACAGATGATGAATTACAAGATAT<br/> CAAGAAGCATTGGTCTTTACTGTTAGAAAAGACATCGGGCCATTGCGGCACCAAAATT<br/> GATCATTTTAGTGATGACTTGCCCAAGACAAGATCCGGCAAAATTATGAGACGTATTTT<br/> AAGAAAAATCCTAGCAGGAGAAAGTGACCAACTAGGCGACGTTTCTACATTGTCAAACC<br/> CTGGCATTGTTAGACATCTAATTGATTTCGGTCAAGTTGTAA </p> |
| YIACS1 | <p> ATGGAGTATTATTGTGGGGTAAACCAGGTGGCAGGTGGCAGGTGGCAGGTGGCAGGTGT<br/> GGCAGGTGGTGGCACGATGGGGGCTGGTGGTGGTACGAAGGTGGCAGCAAAGTCACACC<br/> GAGCCCTACGCCTCCTCAAACCAACCACCATGTGACTCAACAGCCTCTGACATGGCCC<br/> ACACACCAGCCAGCGCTACTCAGAACCGGAGCGGGATCCAACGTCCACTCTCTCTTCG<br/> ACAATGGGGCCTGGTCTGCCGATAGCGCTTCCGTTGTACCTGCACAAGAGATGCAAAA<br/> AACTGCACACTCCATACTAACCATTTAGTGACTACTGTTTCCTTAGCAACACTGACGC<br/> CATTCTCAAGGGTGTGAGATCCGGGTAACATCCCGCCAACGCCCAGCACATCTTCTC<br/> CAAGGAGGCTCTGGCTTTATCGCCACCCTGCACCGAACCTTCGATGCCCCGACGACGAC<br/> GCTCCTTGCTGCTCGAGTCGCTCGACAGGCCCGAATCGATGCCGGCGAGTTCCCCGACTT<br/> CCTCCCCGAGACCAAGAACATCCGAGATGACCCCACTTGGCAGGGTGCCCCCCCCGCCCC<br/> CGGTCTGGTTGATCGACGAGTCGAGATCACCGGCCCACTGACCGAAAGATGGTCATCA<br/> ACGCCCTGAACTCCGACGTCTGGACCTACATGGCTGACTTTGAGGACTCCTCTGCCCCCA<br/> CCTGGTCCAACATGGTCGATGGTCAGGTCAACCTCTACGACGGTGTCCGACGAACCATCA<br/> CCTTCCAGGCCCCCGGTGGAAAGTCTTACAAGCTCCGATCCGACAAGGAGAAGCTCCCC </p>                                                                                                                                                                                                                                                                                                                                                                                                                                                                                                                                                                                                                                                                                                                                                                                                                                                                                                                                                                                                                                                                             |



|        |                                                                                                                                                                                                                                                                                                                                                                                                                                                                                                                                                                                                                                                                                                                                                                                                                                                                                                                                                                                                                                                                                                                                                                                                                                                                                                                                                                                                                                                                                                                                                                                                                                                                                   |
|--------|-----------------------------------------------------------------------------------------------------------------------------------------------------------------------------------------------------------------------------------------------------------------------------------------------------------------------------------------------------------------------------------------------------------------------------------------------------------------------------------------------------------------------------------------------------------------------------------------------------------------------------------------------------------------------------------------------------------------------------------------------------------------------------------------------------------------------------------------------------------------------------------------------------------------------------------------------------------------------------------------------------------------------------------------------------------------------------------------------------------------------------------------------------------------------------------------------------------------------------------------------------------------------------------------------------------------------------------------------------------------------------------------------------------------------------------------------------------------------------------------------------------------------------------------------------------------------------------------------------------------------------------------------------------------------------------|
|        | <p> ACCTTATCGTCCGACCTCGAGGCTGGCACCTTGATGAGACCCACTTCCTTGTTGATGGC<br/> AAGCCCATCTCCGGTGGTCTCTTTGATTTCCGGTCTGTACTTCTTCAACAACGCCAAGGAGT<br/> CCGTTGCTCGAGGCGCTGGCCCTTACTTCTACCTCCCAAGATGGAGTCCCACCTTGAGG<br/> CCGACTCTGGAACGACGTCTTCAAGCTCTCTCAGGACTGGATCGGCATGCCCCGAGGAA<br/> CCATCCGAGGTACCGTTCTGATCGAGACCATTCTCGCCGCCTTTGAGATGGACGAGATCA<br/> TCTACGAGCTCCGAGAGCACTCCTCTGGTCTCAACTGTGGCCGATGGGATTACATCTTCT<br/> CCTTCATCAAGAAGTTCAAGAACCATCCCGAGTTTGTCTCCCCGACCGAGGTGACGTTA<br/> CCATGACCGTCCCTTACATGTCTGCTTACGTCAAGCTCCTCATCCAGACCTGCCACAAGC<br/> GAGGCGTCCACGCCATGGGCGGTATGGCTGCTCAGATCCCCATCAAGAACGATGCTGCT<br/> GCCAACAAGGTTGCCATGGAGGGTGTCTACAAGGACAAGCTCCGAGAGGTGACCGCCGG<br/> CCACGACGGTACCTGGGTTGCTACCCCCAGTTGCCATCATCGCCTCCGAGGTTTTCAA<br/> CAAGCACATGCCCACCTCCTAACCAGATCTACCGACGACGAGAGGATGTCCACATCACCG<br/> CTCGAGACCTCATCAACCTTACATTGAGGGCGGCAAGATCACCGAGGAGGGTATCCGA<br/> AAGAACCTGTTTCATCGGTCTTGGCTACATGGAGGCCCTGGCTCCGTGGTCTTGGTTGTGTC<br/> CCCATCAACTACTTGATGGAGGATGCTGCCACCGCTGAGGTGTCTCGATCTCAGTCCAC<br/> CAGTGGGTCAAGCACGGTGTACCACCGCCGAAGGCAAGAAGGTCACCAAGGACTACGC<br/> CGTCAAGCTTCTCAACGAGGAGACCGACAAGCTCATCAAGAACTCAAGCCCGCAACA<br/> AGTTTGCTGAGGCCGCCGCTTACTTCAAGCCCGAGATTGTTGGCGACAAGTACTCCGACT<br/> TCCTCACCACTCTCCTTTACGACCAGATCACCTCCGTTGGCAGCTCTTCCAAGCTCTAA </p>                                                                                                                                                                                                                                                                                                                                                                                      |
| YIACS2 | <p> ATGACAGTCAACTCCACTTTTAGATCGGCATCAACTTCCCCGAAACTGGGCAAAACCAGC<br/> CAGGCAGACATCCTGAGCCCCGAGGCCCAAAAGTTCTGGTTGAACTCCACAGCAACTTC<br/> AACCAGCGACGTCTGGAGCTCCTTGATCTGCGTCAGAAGAACCAGCTCAAGCTCGATGC<br/> AGGCGAAATCCCCACGTATCCACGGAAACAGCAGACATCCGAGCAGACAAGTCGTGGA<br/> CAGGTCCATCTCTGGTCCCGGTCTCCATGACCGACGGGTGAAATCACTGGCCCCCAG<br/> ACCGAAAGATGATCATCAACGCCCTCAACACAAACGTCGCCACCTACATGTCCGATTTCG<br/> AGGACTCCCAAGCCCCACCTGGGACAACGTCTCGATGGGCAAGTCAACCTGTACGAT<br/> GCCATCCGAAACCAGGTTGATTTCGACACAGAGAAGAAACCTACAAGCTGACTACAAA<br/> GAAGTGGACCGAGGGGACCTACTTAGAGGCTCCACGGACACTCGACCCACTTTTTGGT<br/> GCGCCCTAGAGGCTGGCACATGCTCGAAAGCCATGTTTCAGATCGATGGACAGAGCATGT<br/> CTGGGTCTCTGTTGACTTTGGACTCTTCTTCTTCAACAACGCCAAGGCTCTGATTGAGGC<br/> TGGCCGAGGCCCTTACTTTTACCTCCCCAAGATGGAGCATTATCTCGAGGCTCGACTCTG<br/> GAATGATGTCTTTGTTTTCTCTCAAACTACTGCGGAATCCCCAGGGCACCATTGAGC<br/> TACTTGTCTGATTGAGACTCTTCTGACGCTCTGCACATGGAGGAGATCATCTACGAGCT<br/> GCGAGATCACTCTGCCGGCCTCAACTGTGGTCGATGGGACTACATGTTCTCAGTTATCAA<br/> GCGGTTCCGAAACCAGCCCAGAAAGCTGCTTCTGACCGAAAGATGATCACCATGACCG<br/> TTCCCTTCATGAACGCTTACGTGACTCGTCTGGTTACGTGTGTCAAAACGAAAGGTGC<br/> ATGCCATGGGAGGTATGGCTGCCATATTCTCTCAAGGATGCTGCGGAGAACGCCCTTG<br/> CCATGGAGAAGGTCAAGGCTGACAAACAGAGAGGCCTCTGCAGGCTGTGACGGTACC<br/> TGGATCGCTCATCCCGTTTGGCTGAGACTGCCACCAAGGAGTTTGACGAGTTGATGCCA<br/> GGGGAAAACCAATTTGATTTCGTGCGAGAGGACGTTCCCTCCGAGAAGCTGTTGGATACT<br/> ACCATTGAAGGCTTTGCCATACCAAGGAGGGTCTTCAGGAGAATGTCTACATTGGTCTG<br/> CGCTACATGGAGGCATGGCTGCGAGGGTTGGGATGTGTGCCCATCAACAACCTCATGGA<br/> GGATGCTGCTACTGCCGAGGTTTCTCGTGCCAGCTGTGGCAGTGACCAAGCACGGCAA<br/> GTTACCAAGGAGGAGGTATTGGAGATGATTTCAGGAGGCCGAGAAGCTGGGAAACA </p> |

|                        |                                                                                                                                                                                                                                                                                                                                                                                                                                                                                                                                                                                                                                                                                                                                                                                                                                                                                                                                                                                                                                                                                                                                                                                                                                                                                                                                                                                                                                                                                                                                                                                                                                                                                                                                                                                                                                                                                                                                                                                                                                                                                                                                                         |
|------------------------|---------------------------------------------------------------------------------------------------------------------------------------------------------------------------------------------------------------------------------------------------------------------------------------------------------------------------------------------------------------------------------------------------------------------------------------------------------------------------------------------------------------------------------------------------------------------------------------------------------------------------------------------------------------------------------------------------------------------------------------------------------------------------------------------------------------------------------------------------------------------------------------------------------------------------------------------------------------------------------------------------------------------------------------------------------------------------------------------------------------------------------------------------------------------------------------------------------------------------------------------------------------------------------------------------------------------------------------------------------------------------------------------------------------------------------------------------------------------------------------------------------------------------------------------------------------------------------------------------------------------------------------------------------------------------------------------------------------------------------------------------------------------------------------------------------------------------------------------------------------------------------------------------------------------------------------------------------------------------------------------------------------------------------------------------------------------------------------------------------------------------------------------------------|
|                        | CCGACTCTGTCAAGCGAGCAGGCGAGTTGCTGGGATCTGAGATTGGCGGCGATTTTGCAG<br>AGTTCCTCACCGATCTGCTGTATCCTGATCTGGTTGAACAGTAG                                                                                                                                                                                                                                                                                                                                                                                                                                                                                                                                                                                                                                                                                                                                                                                                                                                                                                                                                                                                                                                                                                                                                                                                                                                                                                                                                                                                                                                                                                                                                                                                                                                                                                                                                                                                                                                                                                                                                                                                                                            |
| SeACS <sup>L641D</sup> | ATGTCTCAGACGCATAAGCACGCCATTCCAGCAAACATAGCCGACAGATGTTTAATAAAT<br>CCAGAACAATACGAGACTAAGTACAAGCAGTCAATTAATGACCCAGACACCTTTTGGGG<br>CGAACAAGGTAAAAATTTAGACTGGATCACACCCTACCAAAAAGTCAAGAACACATCAT<br>TTGCACCTGGTAATGTCTCCATAAAGTGGTACGAGGATGGAACTTTGAACCTAGCAGCGA<br>ACTGTTTGGACAGGCACTTGCAGGAGAACGGAGATAGGACGGCTATTATTTGGGAGGGT<br>GACGATGCTTCACAAAGTAAGCATATTTCTTACAGAGAATTACACAGAGATGTTTGTCTG<br>TTGCTAATACACTGTTAGATCTTGGCATCAAGAAAGGAGATGTTGTTGCGATCTACATG<br>CCCATGGTTCCCGAGGCTGCTGTGGCTATGTTAGCATGCGCTCGTATTGGTGCCGTACAC<br>TCTGTCATCTTTGGCGGATTTTACCAGGAGGCAATTGCAGGGAGAATAATCGACAGTAGT<br>AGCAGATTGGTTATCACTGCTGATGAAGGCGTAAGAGCCGGGAGGTCAATTCCTTGAA<br>AAAAAATGTCGACGACGCTCTTAAAAATCCCAATGTACGCTGTGCGAACACGTCATTGT<br>CCTGAAAAGGACTGGAAATGATATAGATTGGCAAGAAGGTAGAGACCTATGGTGGAGAG<br>ACTTAATCGAAAAAGCCAGTCCCGAGCATCAGCCAGAAGCAATGAACGCGGAAGATCCA<br>CTATTCATTCTATACACCTCAGGCTCAACTGGCAAGCCCAAGGGTGTATTGCATACAAC<br>GGTGGATACTTGGTCTACGCCGCTACTACTTTCAAATACGTATTGATTACCATCCGGGT<br>GATATATATTGGTGCACCGCTGATGTGCGATGGGTTACGGGGCATTACACTTGTCTTAC<br>GGCCCACTTGCTGTGGAGCTACTACTTTATGTTTGAAGGGGTCCCAAACTGGCCAACA<br>CCCACAAGGATGTGCCAAGTCGTTGATAAACATCAAGTAAACATACTTTATACCGCACCC<br>ACTGCTATCAGAGCCCTGATGGCCGAAGGGGATAAAGCGATTGAAGGTAAGTATAGAA<br>TTCTTTGAGAATATTGGGTAGCGTTGGGGAACCAATCAATCCGGAGGCTTGGGAGTGGTA<br>TTGGAAGAAGATTGGTAAAGAGAAATGTCCAGTGGTAGACACCTGGTGGCAGACAGAAA<br>CAGGTGGTTTTATGATTACACCATACCTGGGGCAATAGAATTGAAAGCAGGAAGTGCTA<br>CACGTCCCTTTTTTGGGGTGCAACCGCCTTAGTCGATAACGAAGGGCACCCGAAGAAG<br>GTGCAACAGAAGGTAATTTGGTCATAACAGATAGCTGGCCAGGACAAGCGAGAACATTG<br>TTTGGCGATCATGAACGTTTCGAACAGACATATTTTAGTACTTTCAAAAACATGTATTTTA<br>GCGGCGATGGCGCTAGAAGGGATGAAGACGGTTATTATTGGATTACTGGTAGGGTGGAT<br>GACGTGTTGAATGTCTCCGGACACAGATTAGGTACAGCTGAAATTGAAAGCGCGTTGGTC<br>GCACATCCTAAGATTGCAGAGGCAGCTGTCGTAGGCATTCTCATGCAATTAAGGGACA<br>AGCTATTTATGCTTACGTTACACTAAATCATGGTGAAGAACCAAGTCCTGAGTTATACGC<br>AGAGGTGAGAACTGGGTGAGAAAGGAAATTGGTCCCTTAGCTACTCCGGACGTACTAC<br>ATTGGACGGAATCTCTACCTAAAACGAGGAGTGGCAAGATAATGAGAAGGATTTAAGA<br>AAGATAGCCGCAGGAGATACGTCTAATTTGGGTGATACCAGCACCTTAGCTGACCCAGG<br>GGTCGTGAAAAACCTTTGGAAGAAAAACAGGCTATTGCTATGCCATCTTAA |

## References

- [1] Y.J. Zhou, N.A. Buijs, Z. Zhu, J. Qin, V. Siewers, J. Nielsen, Production of fatty acid-derived oleochemicals and biofuels by synthetic yeast cell factories, *Nat Commun* 7 (2016) 11709.
